# Supplementary material for: Norepinephrine‐CREB1‐miR‐373 axis promotes progression of colon cancer
Source: PubMed Central journal article supplement (PMC7191185; doi:10.1002/1878-0261.12657), 2020-03-13
Supplement: MOL2-14-1059-s002.pdf [file MOL2-14-1059-s002.pdf]

Supplementary tables

**Norepinephrine-CREB1-miR-373 axis promotes colon cancer growth****Table S1. Sequences of interference oligonucleotides.**

| <b>Name</b>       | <b>Sequence</b>                                                  |
|-------------------|------------------------------------------------------------------|
| NC                | sense: UUCUCCGAACGUGUCACGUTT<br>antisense: ACGUGACACGUUCGGAGAATT |
| siCREB1-1         | sense: GCAGCUCGAGAGUGUCGUATT<br>antisense: UACGACACUCUCGAGCUGCTT |
| siCREB1-2         | sense: GCGAAGGGAAAUUCUUUCATT<br>antisense: UGAAAGAAUUUCCCUUCGCTT |
| mNC               | CAGUACUUUUGUGUAGUACAA                                            |
| miR-373 inhibitor | ACACCCCAAAAUCGAAGCACUUC                                          |

**Table S2. Primers for qRT-PCR.**

| <b>Primer name</b> | <b>Sequence</b>                                                 |
|--------------------|-----------------------------------------------------------------|
| miR-373-3P RT      | GTCGTATCCAGTGCCTGTCTCGTGGAGTCGG<br>CAATTGCACTGGATACGACACACCCCAA |
| miR-373-3P F       | ATCCAGTGCGTGTCTCGTGG                                            |
| miR-373-3P R       | AGCCTGAAGTGCTTCGATT                                             |
| u6 RT              | CGCTTCACGAATTTGCGTGTCTCAT                                       |
| u6 F               | GCTTCGGCAGCACATATACTAAAAT                                       |
| u6 R               | CGCTTCACGAATTTGCGTGTCTCAT                                       |
| CREB1-F            | TTCTCCGGAACACAGATTTCA                                           |
| CREB1-R            | TGTCCATCAGTGGTCTGTGC                                            |
| $\beta$ -actin F   | CCAACCGCGAGAAGATGA                                              |
| $\beta$ -actin R   | CCAGAGGCGTACAGGGATAG                                            |
| TIMP2-F            | TAGTGATCAGGGCCAAAGCG                                            |
| TIMP2-R            | AGGGCACGATGAAGTCACAG                                            |
| APC-F              | CTCGGAAATGGGGTCCAAGG                                            |
| APC-R              | GGAGGGACATTTTTGACCGC                                            |

**Table S3. primer pairs used in ChIP assay.**

| <b>primer pair</b> | <b>sequence</b>        |
|--------------------|------------------------|
| primer pair 1-F    | GTTGAGTGGATGACTGGTGGAA |
| Primer pair 1-R    | ACCCTGCTCCCTTTGATCCTA  |
| primer pair 2-F    | AGCTGCAGTGAACCTTGTCTT  |
| primer pair 2-R    | CAATACTCACAGAGGCCAATGA |
| primer pair 3-F    | AGTGGAAAGTGCTGCGACAT   |
| primer pair 3-R    | TTCCGGAGCCATTACAGCC    |
| primer pair 4-F    | CCAAGGGGCTGTATGCACAA   |

primer pair 4-R GGTTGGCCTCCAATCATCCA

**Table S4. Insert sequence of pGL3-promoter plasmids**

|                      | Plasmid name | Sequence                                                                                                                                                                                                                   |
|----------------------|--------------|----------------------------------------------------------------------------------------------------------------------------------------------------------------------------------------------------------------------------|
| primer pair 2 region | pGL-2-wt     | AGACCTGAGGTGTGG <u>ACGTATCATTGGCCTCTGTGAG</u><br>TATTGCTATGTTATTTTATTTTCTTTTCATTTTACTTTATTTT<br>TTAGGGTCAGGATCTCACTGTCGCC <u>AGGATGAAGTG</u><br><u>CACAGGTAGGATGATGGCGCCTTGCAGCCTCGACCTC</u><br>GGGACTCACCTTTTAGCCTCCAGT   |
|                      | pGL-2-mt     | AGACCTGAGGTGTGG <u>cacTATCATTGGCCTCTGTGAGT</u><br>ATTGCTATGTTATTTTATTTTCTTTTCATTTTACTTTATTTT<br>TAGGGTCAGGATCTCACTGTCGCC <u>AGGaggTAGacCA</u><br>CAGGTAGGA <u>ccgTGGCGCCTTGCAGCCTCGACCTCCT</u><br>GGGACTCACCTTTTAGCCTCCAGT |
| primer pair 3 region | pGL-3-wt     | GTGGAAAGTGCTGCGACATTTGAG <u>CGTCA</u> CCGGT <u>GAC</u><br>GCCCATATCAACGGATGCCGTGGAGCTCGGTCTTCTG<br>CAGG                                                                                                                    |
|                      | pGL-3-mt     | GTGGAAAGTGCTGCGACATTTGAG <u>tgatCCGGtcta</u> CCCA<br>TATCAACGGATGCCGTGGAGCTCGGTCTTCTGCAGG                                                                                                                                  |

**Table S5. Insert sequences of pmirGLO plasmids.**

| Plasmid name | Sequence                                                                                                                                                                                                                                |
|--------------|-----------------------------------------------------------------------------------------------------------------------------------------------------------------------------------------------------------------------------------------|
| APC-WT       | CTCATCCCTTCCTCGAGTAAGCACTTGGACTGTACAATAGAAGCAGA<br>ATTAGATGCTCAGCACTTAGCTAGTCAGAGTGAAGTATAATCAGCACT<br>TTAGCAGATCGCAAGCCCTAGGAAAAGCAGCGCAGATAGCACTTCAT<br>GACTCGTGATGCTCTATGAAAGGCTGCATGAGAGCACTTGTCTAGAT<br>CGAGTACCTAAAAATAAAGCACCTAC |
| APC-MT       | CTCATCCCTTCCTCGAGTAACTGTTGGACTGTACAATAGAAGCAGAA<br>TTAGATGCTCACTGTTAGCTAGTCAGAGTGAAGTATAACTACTGTTA<br>GCAGATCGCAAGCCCTAGGAAAAGCAGCGCAGATACTGTTTCATGAC<br>TCGTGATGCTCTATGAAAGGCTGCATGAGACTGTTGTCTAGATCGAG<br>TACCTAAAAAACTGCCTAC         |
| TIMP2-WT     | CCGTCACAGATGCCAAGCAGGCAGCACTTAACGAGATCGCTTTCTG<br>CATCGTGGAAGCATTGTC                                                                                                                                                                    |
| TIMP2-MT     | CCGTCACAGATGCCAAGCAGGCAGCACTGTTAACGAGATCGCTTTCTGC<br>ATCGTGATTCAATTGTC                                                                                                                                                                  |
